# Supplementary material
Source: PubMed Central journal article supplement (PMC8559868)
Supplement: NIHMS1716711-supplement-Supplemental_Material.pdf [file NIHMS1716711-supplement-Supplemental_Material.pdf]

**Automaticity as an Independent Trait in Predicting Reading Outcomes in Middle-School**

**- Online Supplementary Material -**

Tanja C Roembke  
tanja.roembke@psych.rwth-aachen.de  
Institute of Psychology, RWTH Aachen University

Eliot Hazeltine  
Dept. of Psychological and Brain Sciences, University of Iowa

Deborah K Reed  
Iowa Reading Research Center, College of Education, University of Iowa

And

Bob McMurray  
Dept. of Psychological and Brain Sciences, Dept. of Communication Sciences and Disorders and  
Dept. of Linguistics, University of Iowa

## S1. Contributions of Each Task

Question 4 addressed the contributions of masked versions of different individual tasks. These analyses could not be reported in the main manuscript due to space restrictions but are included here for completeness. To do so, we asked which tasks individually reached significance in each regression on Step 3 when all factors were entered. As pointed out in the manuscript, we concentrated on fluency and decoding, as neither unmasked nor masked task/versions consistently predicted comprehension. For fluency, we looked at the model where masked task/versions were entered on the third step, thus evaluating individual contributions of masked task/versions. For decoding, we used the model where unmasked tasks were entered on the step three. This was done separately for monosyllabic tasks, nonword trials of monosyllabic tasks, and multisyllabic tasks. For each individual task, we extracted both  $\eta_p^2$  to measure effect size, and its significance (by a t-test on the coefficient). Results are in Table S1;  $\eta_p^2$  for all tasks and outcomes are in Tables S2-S4).

**Monosyllabic tasks.** For fluency, in Wave 1, only the masked version of *Verify* was significant ( $\eta_p^2 = 0.019$ ,  $p = 0.038$ ). Masked versions of *Find the Picture* ( $\eta_p^2 = 0.015$ ,  $p = 0.071$ ) and *Find the Rhyme* ( $\eta_p^2 = 0.014$ ,  $p = 0.078$ ) were not. In Wave 2, the pattern differed: Masked *Find the Picture* ( $\eta_p^2 = 0.069$ ,  $p < 0.001$ ) and *Find the Rhyme* ( $\eta_p^2 = 0.029$ ,  $p = 0.015$ ) predicted unique variance in fluency, whereas masked *Verify* did not ( $\eta_p^2 = 0.001$ ,  $p = 0.67$ ).

For decoding unmasked *Find the Rhyme* ( $\eta_p^2 = 0.029$ ,  $p = 0.010$ ) and *Verify* ( $\eta_p^2 = 0.076$ ,  $p < 0.001$ ) in Wave 1 as well as *Find the Rhyme* ( $\eta_p^2 = 0.056$ ,  $p = 0.001$ ) in Wave 2 all predicted unique variance on Step 3. This is consistent with the idea that decoding requires participants' activation of phonological representations as needed to identify a rhyme.

**Nonword trials (monosyllabic tasks).** For fluency, analysis of the individual coefficients showed that masked versions of *Find the Rhyme* and *Verify* reached significance on the third regression step in both waves (all  $\eta_p^2 > 0.025$ , all  $p < 0.02$ ). Consistent with the combined analyses, the only unmasked version that reached significance when predicting decoding in both waves was unmasked *Find the Rhyme* (Wave 1:  $\eta_p^2 = 0.54$ ,  $p < 0.001$ ; Wave 2:  $\eta_p^2 = 0.74$ ,  $p < 0.001$ ), supporting the need of phonological information during decoding. In addition, unmasked *Verify* also reached significance in Wave 1 ( $\eta_p^2 = 0.71$ ,  $p < 0.001$ ).

**Multisyllabic tasks.** Both the masked versions of *Find the Picture* and *Verify* reached significance on the final regression step in both waves (Wave 1 and 2: all  $\eta_p^2 > 0.025$ , all  $p < 0.03$ ) for fluency. However, effect sizes were higher for *Find the Picture* in both waves (Table S1). For decoding, unmasked *Verify* reached significance on the third step in both waves (all  $\eta_p^2 > 0.032$ , all  $p < 0.011$ ), whereas *Find the Picture* did not contribute significantly in either wave.

**Table S1**

*Overview of partial eta-squared for each task version at the final level of the hierarchical regression model when either masked or unmasked task versions were entered on the final step.  $P < .05$  is marked with \*;  $p < .001$  is marked with \*\*. The complete list of all partial eta-squared values for each task is presented in Tables S2-S4.*

| Task type                     | Outcome (task version) | Wave | Picture | Rhyme   | Verify  |
|-------------------------------|------------------------|------|---------|---------|---------|
| Mono-syllabic                 | Fluency                | 1    | 0.015   | 0.014   | 0.019*  |
|                               | (masked)               | 2    | 0.069** | 0.029*  | 0.001   |
|                               | Decoding               | 1    | 0.003   | 0.029*  | 0.076*  |
|                               | (unmasked)             | 2    | 0.016   | 0.056*  | 0.003   |
| Mono-syllabic, nonword trials | Fluency                | 1    | -       | 0.044*  | 0.041*  |
|                               | (masked)               | 2    | -       | 0.044** | 0.027*  |
|                               | Decoding               | 1    | -       | 0.054** | 0.071** |
|                               | (unmasked)             | 2    | -       | 0.074** | <0.001  |
| Multi-syllabic                | Fluency                | 1    | 0.077** | -       | 0.026*  |
|                               | (masked)               | 2    | 0.186** | -       | 0.025*  |
|                               | Decoding               | 1    | 0.016   | -       | 0.084** |
|                               | (unmasked)             | 2    | 0.005   | -       | 0.032*  |

**Table S2**

*Overview of partial eta-squared for each task version at the final level of the hierarchical regression model when either masked or unmasked monosyllabic task versions were entered on the final step.  $P < .05$  is marked with \*;  $p < .001$  is marked with \*\*.*

| Task version (entered last) | Outcome       | Wave | Picture | Rhyme  | Verify  |
|-----------------------------|---------------|------|---------|--------|---------|
| masked                      | Fluency       | 1    | 0.015   | 0.014  | 0.019*  |
|                             |               | 2    | 0.069** | 0.029* | 0.001   |
|                             | Decoding      | 1    | < 0.001 | 0.003  | 0.005   |
|                             |               | 2    | < 0.001 | 0.022* | 0.004   |
|                             | Comprehension | 1    | 0.046*  | 0.005  | < 0.001 |
|                             |               | 2    | 0.020*  | 0.003  | < 0.001 |
| unmasked                    | Fluency       | 1    | 0.020*  | 0.003  | 0.013   |
|                             |               | 2    | 0.043*  | 0.028* | 0.006   |
|                             | Decoding      | 1    | 0.003   | 0.029* | 0.076*  |
|                             |               | 2    | 0.016   | 0.056* | 0.003   |
|                             | Comprehension | 1    | < 0.001 | 0.003  | 0.018*  |
|                             |               | 2    | < 0.001 | 0.035* | 0.001   |

**Table S3**

*Overview of partial eta-squared for each task version including only nonword trials at the final level of the hierarchical regression model when either masked or unmasked monosyllabic task versions were entered on the final step.  $P < .05$  is marked with \*;  $p < .001$  is marked with \*\*.*

| Task version<br>(entered last) | Outcome       | Rhyme   | Verify  |
|--------------------------------|---------------|---------|---------|
| masked                         | Fluency       | 0.044*  | 0.041*  |
|                                |               | 0.044** | 0.027*  |
|                                | Decoding      | 0.008   | 0.006   |
|                                |               | 0.046** | 0.001   |
|                                | Comprehension | 0.009   | 0.005   |
|                                |               | 0.004   | 0.008   |
| unmasked                       | Fluency       | 0.009   | 0.008   |
|                                |               | 0.096** | 0.007   |
|                                | Decoding      | 0.054** | 0.071** |
|                                |               | 0.074** | <0.001  |
|                                | Comprehension | <0.001  | 0.017*  |
|                                |               | 0.062** | <0.001  |

**Table S4**

*Overview of partial eta-squared for each task version at the final level of the hierarchical regression model when either masked or unmasked multisyllabic task versions were entered on the final step.  $P < .05$  is marked with \*;  $p < .001$  is marked with \*\*.*

| Task version<br>(entered last) | Outcome       | Picture | Verify  |
|--------------------------------|---------------|---------|---------|
| masked                         | Fluency       | 0.077** | 0.026*  |
|                                |               | 0.186** | 0.025*  |
|                                | Decoding      | < 0.001 | 0.010   |
|                                |               | 0.067** | 0.005   |
|                                | Comprehension | 0.034*  | 0.015   |
|                                |               | 0.039*  | 0.019*  |
| unmasked                       | Fluency       | 0.032*  | 0.014   |
|                                |               | 0.002   | 0.002   |
|                                | Decoding      | 0.016   | 0.084** |
|                                |               | 0.005   | 0.032*  |
|                                | Comprehension | 0.001   | 0.001   |
|                                |               | 0.003   | 0.004   |

## S2. Ceiling Effects

As discussed in the main manuscript, the monosyllabic task version of *Find the Picture* was the task with the highest number of children that performed at ceiling. To investigate the influence of potential ceiling effects, we replicated our primary analysis of monosyllabic words without either version of *Find the Picture* for Wave 1. The results of this are presented in Table S5; it should be noted that the first line includes the original analysis and the second line the replication without *Find the Picture* (here abbreviated as *FTP*). Importantly, the pattern of results remained the same across analysis, suggesting that the high overall performance in the *Find the Picture* task did not distort our results.

**Table S5**

*Overview of communality analysis including shared and unique variance for masked and unmasked tasks for all monosyllabic tasks and monosyllabic tasks without Find the Picture (termed here “No FTP”).  $P < .05$  is marked with \*;  $p < .001$  is marked with \*\*. Overall  $R^2$  includes contribution of oral vocabulary (PPVT).*

|              | Outcome       | Tasks  | Overall<br>$R^2$ | Shared<br>$\Delta R^2$ | Unmasked<br>$\Delta R^2$ | Masked<br>$\Delta R^2$ |
|--------------|---------------|--------|------------------|------------------------|--------------------------|------------------------|
| Monosyllabic | Fluency       | All    | 0.399            | 0.301                  | 0.030*                   | 0.065**                |
|              |               | No FTP | 0.397            | 0.250                  | 0.044**                  | 0.100**                |
|              | Decoding      | All    | 0.383            | 0.262                  | 0.112**                  | 0.008                  |
|              |               | No FTP | 0.284            | 0.161                  | 0.112**                  | 0.009                  |
|              | Comprehension | All    | 0.194            | 0.084                  | 0.015                    | 0.059*                 |
|              |               | No FTP | 0.181            | 0.079                  | 0.002                    | 0.063**                |

**S3. Correlations Among Tasks****Table S6**

*Correlations among all task versions for monosyllabic and multisyllabic words in Wave 1. “Multi” is used as an abbreviation for multisyllabic task versions.*

|                              | Picture<br>Multi<br>Unmasked | Picture<br>Multi<br>Masked | Verify<br>Multi<br>Unmasked | Verify<br>Multi<br>Masked | Picture<br>Unmasked | Picture<br>Masked | Rhyme<br>Unmasked | Rhyme<br>Masked | Verify<br>Unmasked | Verify<br>Masked |
|------------------------------|------------------------------|----------------------------|-----------------------------|---------------------------|---------------------|-------------------|-------------------|-----------------|--------------------|------------------|
| Picture<br>Multi<br>Unmasked | 1.00                         | 0.55                       | 0.54                        | 0.43                      | 0.60                | 0.57              | 0.51              | 0.49            | 0.47               | 0.49             |
| Picture<br>Multi<br>Masked   | 0.55                         | 1.00                       | 0.52                        | 0.59                      | 0.65                | 0.70              | 0.49              | 0.57            | 0.47               | 0.62             |
| Verify<br>Multi<br>Unmasked  | 0.54                         | 0.52                       | 1.00                        | 0.61                      | 0.45                | 0.49              | 0.53              | 0.50            | 0.66               | 0.58             |
| Verify<br>Multi<br>Masked    | 0.43                         | 0.59                       | 0.61                        | 1.00                      | 0.35                | 0.55              | 0.51              | 0.63            | 0.60               | 0.71             |
| Picture<br>Unmasked          | 0.60                         | 0.65                       | 0.45                        | 0.35                      | 1.00                | 0.56              | 0.44              | 0.47            | 0.36               | 0.47             |
| Picture<br>Masked            | 0.57                         | 0.70                       | 0.49                        | 0.55                      | 0.56                | 1.00              | 0.53              | 0.58            | 0.43               | 0.63             |
| Rhyme<br>Unmasked            | 0.51                         | 0.49                       | 0.53                        | 0.51                      | 0.44                | 0.53              | 1.00              | 0.81            | 0.59               | 0.47             |
| Rhyme<br>Masked              | 0.49                         | 0.57                       | 0.50                        | 0.63                      | 0.47                | 0.58              | 0.81              | 1.00            | 0.52               | 0.63             |
| Verify<br>Unmasked           | 0.47                         | 0.47                       | 0.66                        | 0.60                      | 0.36                | 0.43              | 0.59              | 0.52            | 1.00               | 0.52             |
| Verify<br>Masked             | 0.49                         | 0.62                       | 0.58                        | 0.71                      | 0.47                | 0.63              | 0.47              | 0.63            | 0.52               | 1.00             |



**Table S7**

*Correlations among all task versions for monosyllabic and multisyllabic words in Wave 2. “Multi” is used as an abbreviation for multisyllabic task versions.*

|                              | Picture<br>Multi<br>Unmasked | Picture<br>Multi<br>Masked | Verify<br>Multi<br>Unmasked | Verify<br>Multi<br>Masked | Picture<br>Unmasked | Picture<br>Masked | Rhyme<br>Unmasked | Rhyme<br>Masked | Verify<br>Unmasked | Verify<br>Masked |
|------------------------------|------------------------------|----------------------------|-----------------------------|---------------------------|---------------------|-------------------|-------------------|-----------------|--------------------|------------------|
| Picture<br>Multi<br>Unmasked | 1.00                         | 0.69                       | 0.59                        | 0.52                      | 0.70                | 0.70              | 0.52              | 0.48            | 0.55               | 0.57             |
| Picture<br>Multi<br>Masked   | 0.69                         | 1.00                       | 0.55                        | 0.70                      | 0.69                | 0.81              | 0.68              | 0.67            | 0.54               | 0.67             |
| Verify<br>Multi<br>Unmasked  | 0.59                         | 0.55                       | 1.00                        | 0.59                      | 0.54                | 0.58              | 0.58              | 0.53            | 0.68               | 0.67             |
| Verify<br>Multi<br>Masked    | 0.52                         | 0.70                       | 0.59                        | 1.00                      | 0.45                | 0.70              | 0.60              | 0.65            | 0.55               | 0.73             |
| Picture<br>Unmasked          | 0.70                         | 0.69                       | 0.54                        | 0.45                      | 1.00                | 0.66              | 0.53              | 0.51            | 0.49               | 0.50             |
| Picture<br>Masked            | 0.70                         | 0.81                       | 0.58                        | 0.70                      | 0.66                | 1.00              | 0.63              | 0.62            | 0.57               | 0.67             |
| Rhyme<br>Unmasked            | 0.52                         | 0.68                       | 0.58                        | 0.60                      | 0.53                | 0.63              | 1.00              | 0.79            | 0.55               | 0.55             |
| Rhyme<br>Masked              | 0.48                         | 0.67                       | 0.53                        | 0.65                      | 0.51                | 0.62              | 0.79              | 1.00            | 0.49               | 0.58             |
| Verify<br>Unmasked           | 0.55                         | 0.54                       | 0.68                        | 0.55                      | 0.49                | 0.57              | 0.55              | 0.49            | 1.00               | 0.65             |
| Verify<br>Masked             | 0.57                         | 0.67                       | 0.67                        | 0.73                      | 0.50                | 0.67              | 0.55              | 0.58            | 0.65               | 1.00             |

**Table S8***Correlations among all task versions for nonwords only in Wave 1.*

|                    | Rhyme<br>Unmasked | Rhyme<br>Masked | Verify<br>Unmasked | Verify<br>Masked |
|--------------------|-------------------|-----------------|--------------------|------------------|
| Rhyme<br>Unmasked  | 1.00              | 0.76            | 0.54               | 0.44             |
| Rhyme<br>Masked    | 0.76              | 1.00            | 0.46               | 0.56             |
| Verify<br>Unmasked | 0.54              | 0.46            | 1.00               | 0.45             |
| Verify<br>Masked   | 0.44              | 0.56            | 0.45               | 1.00             |

**Table S9***Correlations among all task versions for nonwords only in Wave 2.*

|                    | Rhyme<br>Unmasked | Rhyme<br>Masked | Verify<br>Unmasked | Verify<br>Masked |
|--------------------|-------------------|-----------------|--------------------|------------------|
| Rhyme<br>Unmasked  | 1.00              | 0.74            | 0.53               | 0.46             |
| Rhyme<br>Masked    | 0.74              | 1.00            | 0.41               | 0.44             |
| Verify<br>Unmasked | 0.53              | 0.41            | 1.00               | 0.50             |
| Verify<br>Masked   | 0.46              | 0.44            | 0.50               | 1.00             |
